# Supplementary material for: Differential Expression of Long Noncoding RNAs Reveals a Potential Biomarker for Intractable Pemphigus
Source: PubMed Central journal article supplement (PMC8440090; doi:10.1155/2021/5594659), 2021-09-03

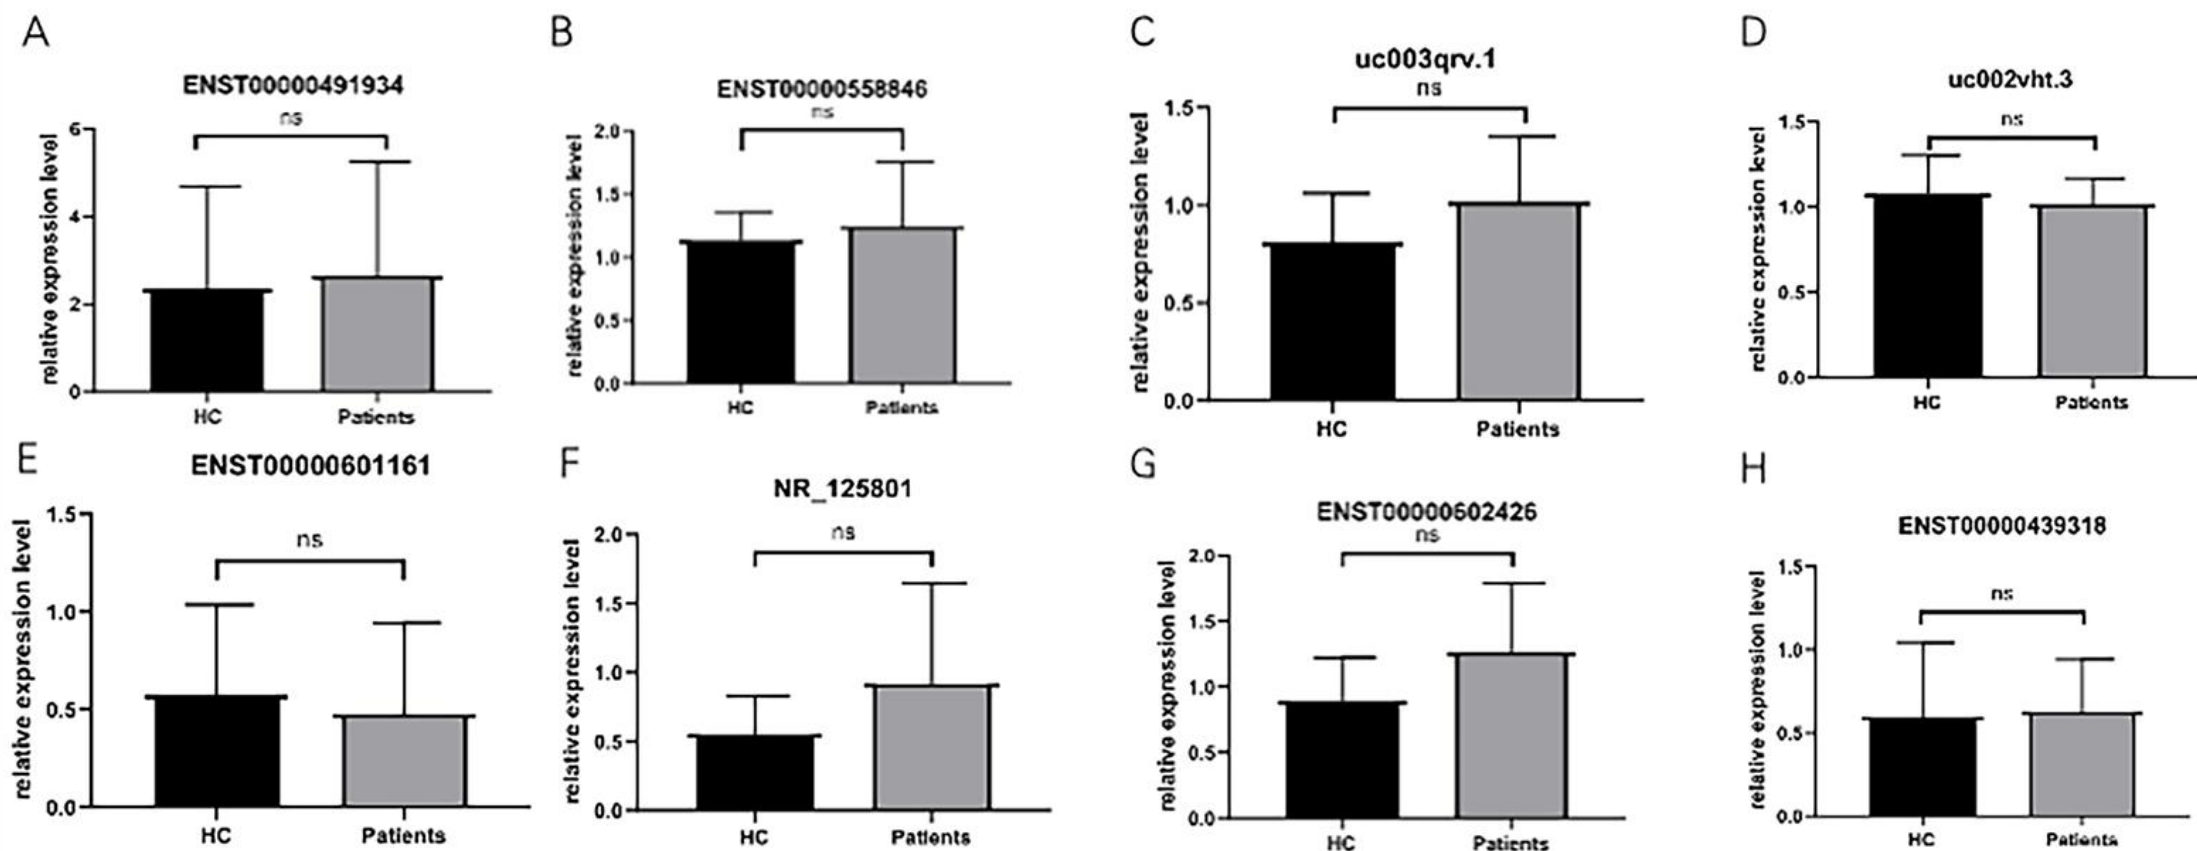

Supplement: 5594659.f1.pdf [file 5594659.f1.pdf]
